# Supplementary material for: Superstructure formation by RodZ hexamers of Shigella sonnei maintains the rod shape of bacilli
Source: PubMed Central journal article supplement (PMC7018016; doi:10.1371/journal.pone.0228052), 2020-02-13

# Report Protein Complex Analysis

## #19122012\_JP\_A

### Samples:

- Wild- type RodZ Protein (1-337aa) (200  $\mu$ L 1mg/mL Buffer : PBS)
- N-Terminal deletion RodZ Protein (50-337aa) (200  $\mu$ L 1mg/mL Buffer : PBS)

### Characterization of molecular weight and stoichiometry characterization

## 1. Material, Methods

### 1.1. Instrumentation

#### ***Mass Spectrometric Measurements (MALDI)***

All the samples measurements were performed using a Bruker Ultraflex III MALDI ToF ToF mass spectrometer equipped with CovalX's HM3 interaction module. CovalX's interaction module contains a special detecting system designed to optimize protein interaction detection up to 2 MDa with nano-molar sensitivity.

### 1.2. Sample preparation:

#### *Control Experiments*

20 $\mu$ l of each protein sample were pipetted to prepare 10 dilutions of the samples with final volume 10 $\mu$ l. These 10 dilutions of the samples were prepared in order to obtain the following expected concentrations:

| Dilution | Wild Type RodZ Protein (1-337aa) |                  | N terminal deletion RodZ protein (50-337aa) |                  |
|----------|----------------------------------|------------------|---------------------------------------------|------------------|
|          | Volume                           | Conc.            | Volume                                      | Conc.            |
| 1        | 10 $\mu$ l                       | 1000 $\mu$ g /ml | 10 $\mu$ l                                  | 1000 $\mu$ g /ml |
| 1/2      | 10 $\mu$ l                       | 500 $\mu$ g/ml   | 10 $\mu$ l                                  | 500 $\mu$ g/ml   |
| 1/4      | 10 $\mu$ l                       | 250 $\mu$ g/ml   | 10 $\mu$ l                                  | 250 $\mu$ g/ml   |
| 1/8      | 10 $\mu$ l                       | 125 $\mu$ g/ml   | 10 $\mu$ l                                  | 125 $\mu$ g/ml   |
| 1/16     | 10 $\mu$ l                       | 62.5 $\mu$ g/ml  | 10 $\mu$ l                                  | 62.5 $\mu$ g/ml  |
| 1/32     | 10 $\mu$ l                       | 31.2 $\mu$ g/ml  | 10 $\mu$ l                                  | 31.2 $\mu$ g/ml  |
| 1/64     | 10 $\mu$ l                       | 15.6 $\mu$ g /ml | 10 $\mu$ l                                  | 15.6 $\mu$ g /ml |
| 1/128    | 10 $\mu$ l                       | 7.8 $\mu$ g/ml   | 10 $\mu$ l                                  | 7.8 $\mu$ g/ml   |
| 1/256    | 10 $\mu$ l                       | 3.9 $\mu$ g/ml   | 10 $\mu$ l                                  | 3.9 $\mu$ g/ml   |
| 1/512    | 10 $\mu$ l                       | 1.9 $\mu$ g/ml   | 10 $\mu$ l                                  | 1.9 $\mu$ g/ml   |

1  $\mu$ l of each dilution obtained is mixed with 1  $\mu$ l of a matrix composed of a re-crystallized sinapinic acid matrix (10 mg/ml) in acetonitrile/water (1:1, v/v), TFA 0.1% (K200 MALDI Kit). After mixing, 1  $\mu$ l of each sample was spotted on the MALDI plate (SCOUT 384). After crystallization at room temperature, the plate was introduced in the MALDI mass spectrometer and analyzed immediately. The analysis has been repeated in triplicate.

### *Cross-link Experiments*

The cross-linking experiments allow the direct analysis of non-covalent interaction by High-Mass MALDI mass. By mixing a protein sample containing non covalent interaction with a specially developed cross-linking mixture (Bich, C et al. *Anal. Chem.*, 2010, 82 (1), pp 172–179), it is possible to specifically detect non covalent complex with high-sensitivity. The covalent binding generated allows the interacting species to survive the sample preparation process and the MALDI ionization. A special High-Mass detection system allows characterizing the interaction in the High-Mass range.

Each mixture prepared for the control experiment (9  $\mu$ l left) was submitted to cross-linking using CovalX's K200 MALDI MS analysis kit. 9  $\mu$ l of the mixtures (from 1 to 1/32) is mixed with 1  $\mu$ l of K200 Stabilizer reagent (2 mg/ml) and incubated at room temperature. After the incubation time (from 1h to 6h) the samples were prepared for MALDI analysis as for Control experiments. The samples are analyzed by High-Mass MALDI analysis immediately after crystallization.

### **1.3. High-Mass MALDI MS analysis**

The MALDI ToF MS analysis has been performed using CovalX's HM3 interaction module with a standard nitrogen laser and focusing on different mass ranges from 0 to 1500 kDa.

For the analysis, the following parameters have been applied:

#### *Mass Spectrometer:*

##### *Linear and Positive mode*

Ion Source 1: 20 kV

Ion Source 2: 17 kV

Lens: 12 kV

Pulse Ion Extraction: 150 ns

#### *HM3:*

Gain Voltage: 3.14 kV

Acceleration Voltage: 20 kV

To calibrate the instrument, an external calibration with clusters of BSA and IgG has been applied. For each sample, 3 spots were analyzed (300 laser shots per spots). The presented spectrum corresponds to the sum of 300 laser shots. The MS data were analyzed using CovalX's Complex Tracker analysis software version 2.0.

## 2. Results

### 2.1. WildTypRODz1-337

#### *Control Experiments*

For these experiments, we detected two major peaks with  $MH+=26.158$  kDa and  $MH+=37.342$  kDa. These two peaks have been detected for every dilution from 1 to 1/512 (Figure 1, Control, p5).

| Observed Molecular Weight (Da) | Proposed Stoichiometry |
|--------------------------------|------------------------|
| 26.158                         | A                      |
| 36.712                         | Wild Typ Rodz 1-337    |

#### *Cross-Link Experiments*

For these experiments, we detected one major non covalent complex with  $MH+=233.351$  kDa (Figure 1, Cross-Link, p5). Using Complex Tracker Software we overlay the control and cross-link spectra. The spectrum obtained allowed to characterize the non covalent protein complex:

| Observed Molecular Weight (Da) | Proposed Stoichiometry |
|--------------------------------|------------------------|
| 220.455                        | 6WildTypRodz1-337      |

This non covalent protein complex corresponds to an hexamer of WildTypRodz 1-337.

The spectra corresponding to the analysis are presented in Figure 1 p5.

### 2.2. N-terminal deletion RODz50-337

#### *Control Experiments*

For these experiments, we detected two major peaks with  $MH+=26.184$  kDa and  $MH+=30.692$  kDa. These two peaks have been detected for every dilution from 1 to 1/512 (Figure 2, Control, p6).

| Observed Molecular Weight (Da) | Proposed Stoichiometry         |
|--------------------------------|--------------------------------|
| 26.184                         | A                              |
| 30.692                         | N-terminal deletion RODz50-337 |

### *Cross-Link Experiments*

For these experiments, we detected one major non covalent complex with  $MH^+=191.059$  kDa. An additional peak, related with the non covalent complex is also detected with  $MH^+=185.798$  kDa (Figure 2, Cross-Link, p6). Using Complex Tracker Software we overlay the control and cross-link spectra. The spectrum obtained allowed to characterize the non covalent protein complex:

| Observed Molecular Weight (Da) | Proposed Stoichiometry          |
|--------------------------------|---------------------------------|
| 185.189                        | 6N-terminal deletion RODz50-337 |

This non covalent protein complex corresponds to an hexamer of N-terminal deletion RODz50-337. The non covalent protein complex detected with  $MH^+=180.028$  may corresponds to an hexamer of 6N-terminal deletion RODz50-337 with a deletion part.

The spectra corresponding to the analysis are presented in Figure 2 p6.

**Figure 1: WildtypRodZ(1-337)**  
[Dilution 1/4=250µg/mL  
Total Volume: 10 µl  
Cross-link: DSS, 180 minutes incubation time

**HM3 High Mass MALDI ToF Analysis**  
**CovalX for AMR 17/12/12**

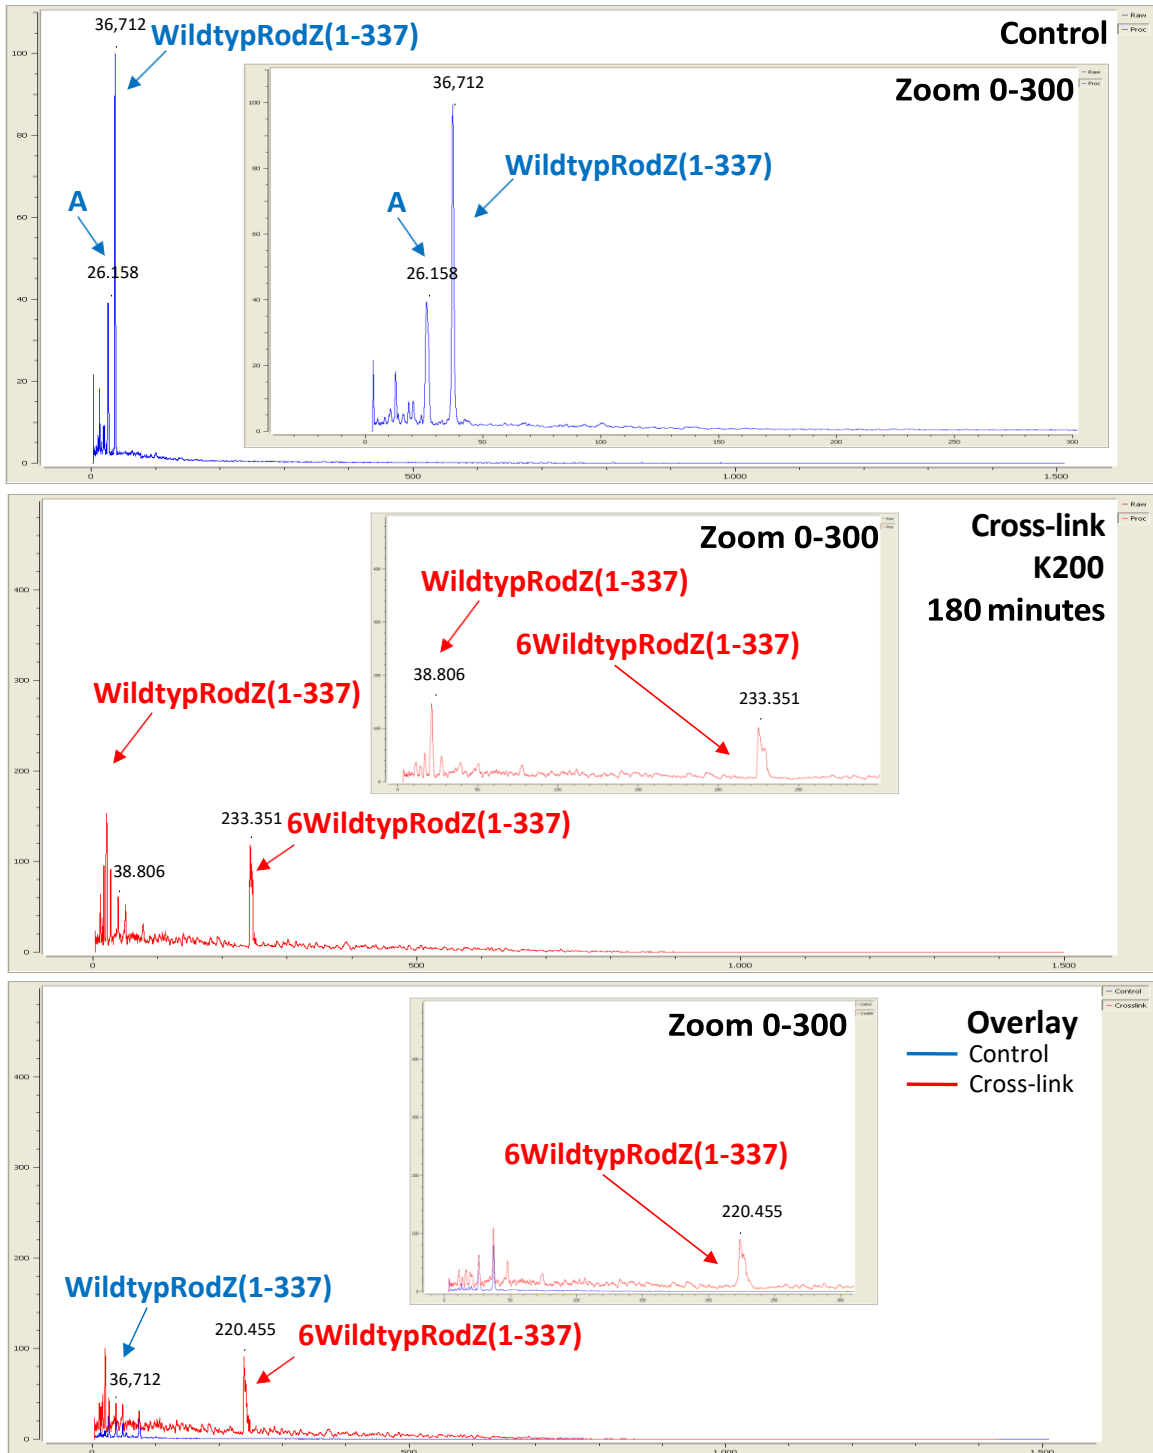

**Figure 2: N-Terminal deletion RodZ protein (50-337aa) HM3 HighMass MALDI ToF Analysis**  
 Dilution 1/4=250µg/mL  
 Total Volume: 10 µl  
 Cross-link: DSS, 180 minutes incubation time

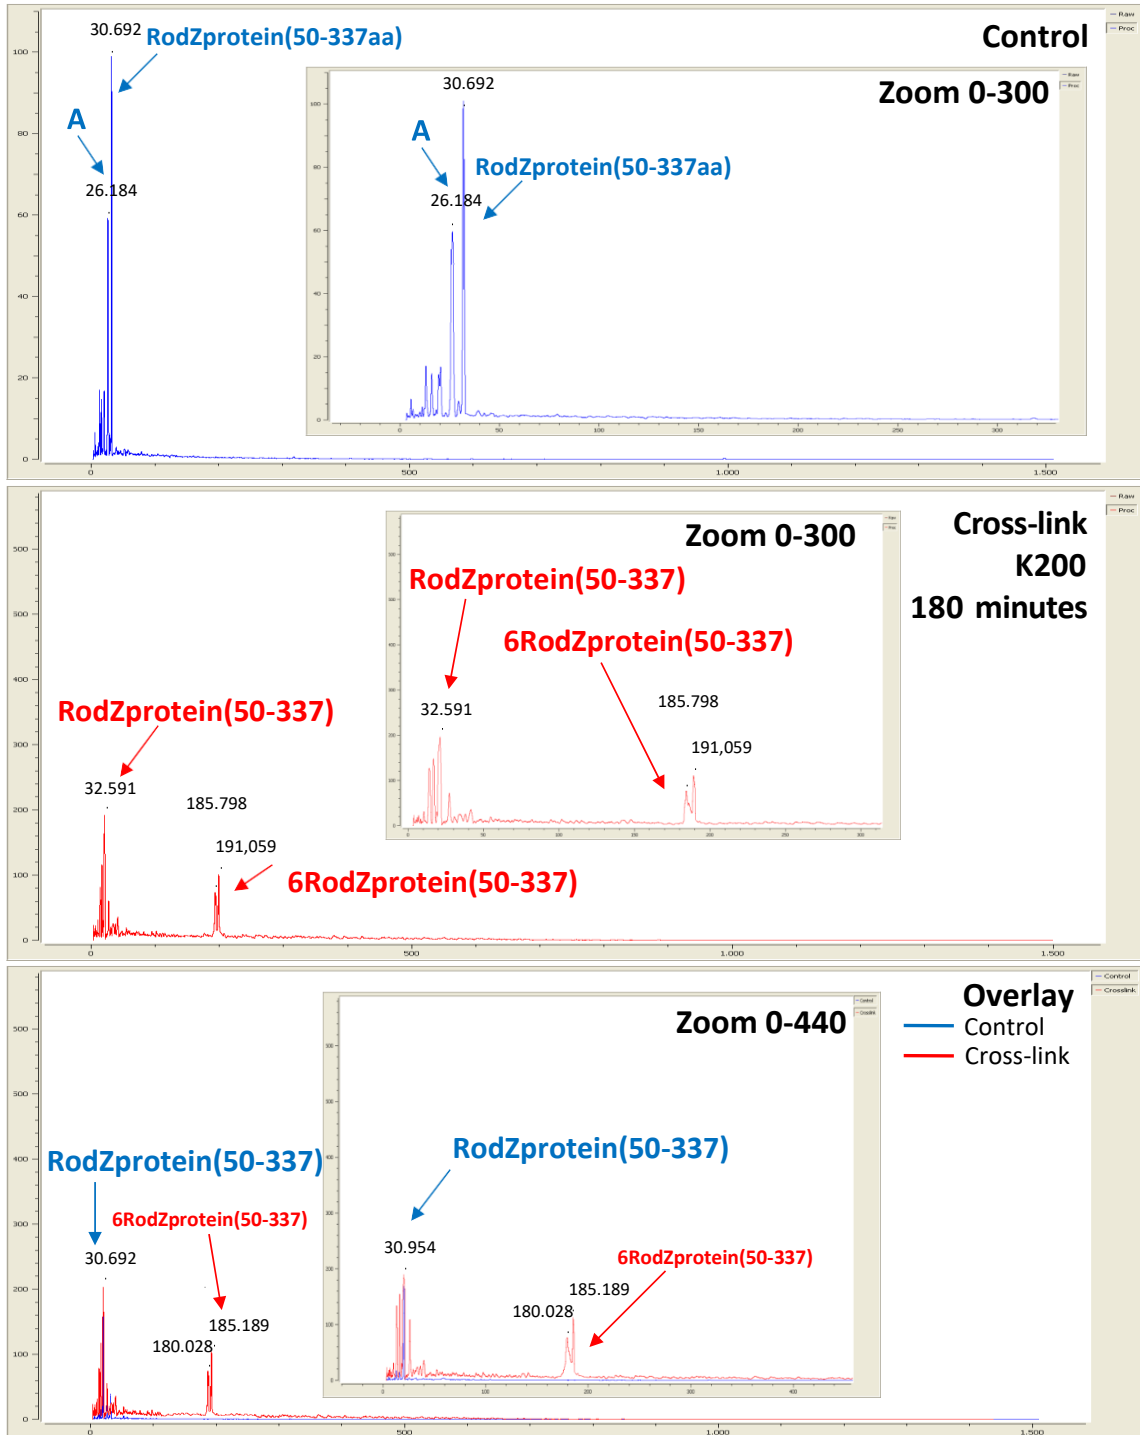

Supplement: pone.0228052.s007.pdf [file pone.0228052.s007.pdf]
