# Supplementary material for: Superstructure formation by RodZ hexamers of Shigella sonnei maintains the rod shape of bacilli
Source: PubMed Central journal article supplement (PMC7018016; doi:10.1371/journal.pone.0228052), 2020-02-13
Supplement: pone.0228052.s006.pdf [file pone.0228052.s006.pdf]

Fig. 2B

**X X X X X 1 2 3 4 5 6 7**

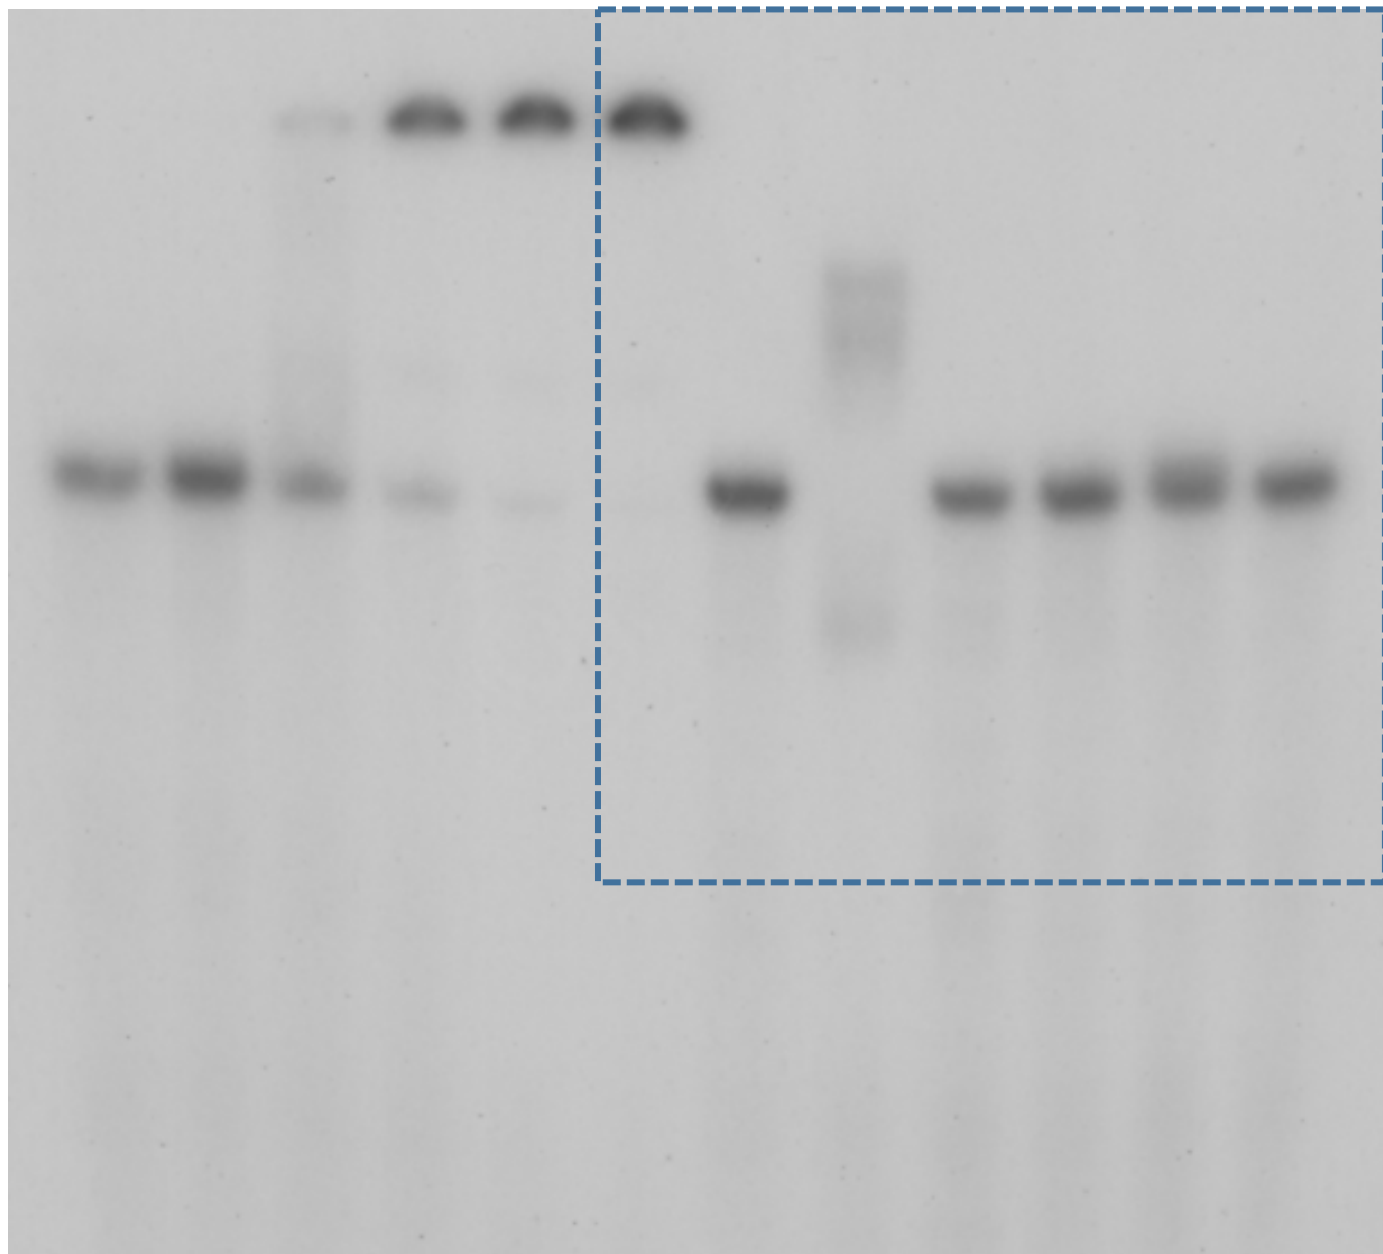

**Fig. 2D**

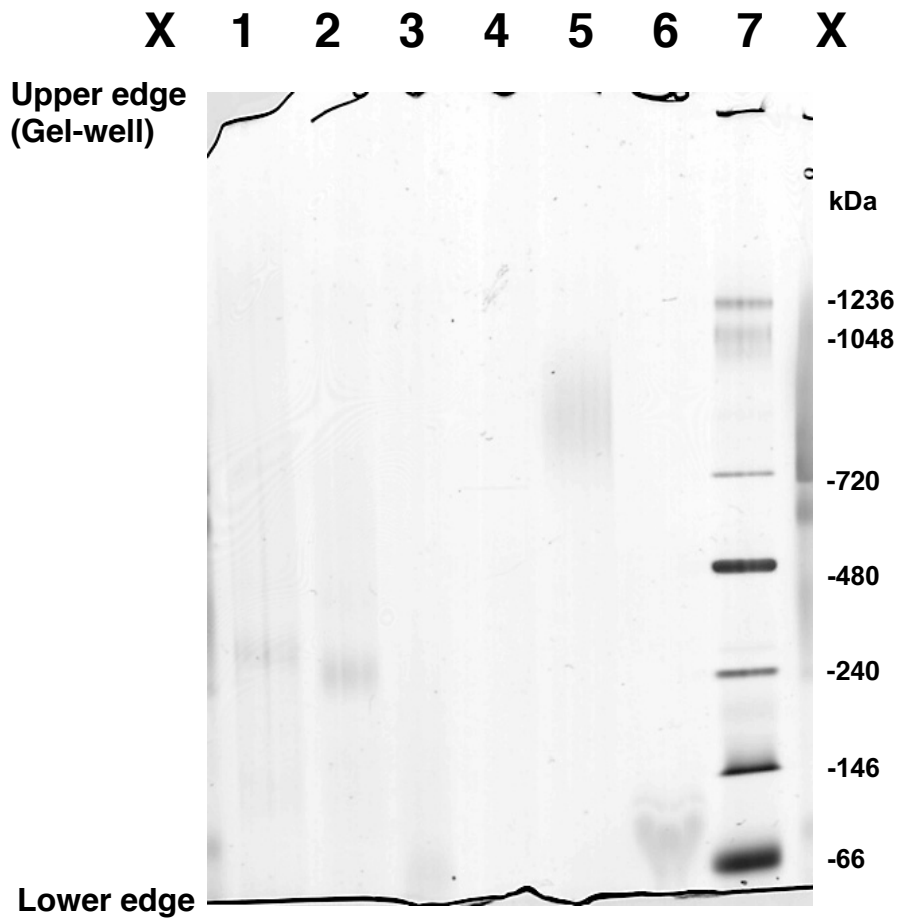

**Fig. 4A**

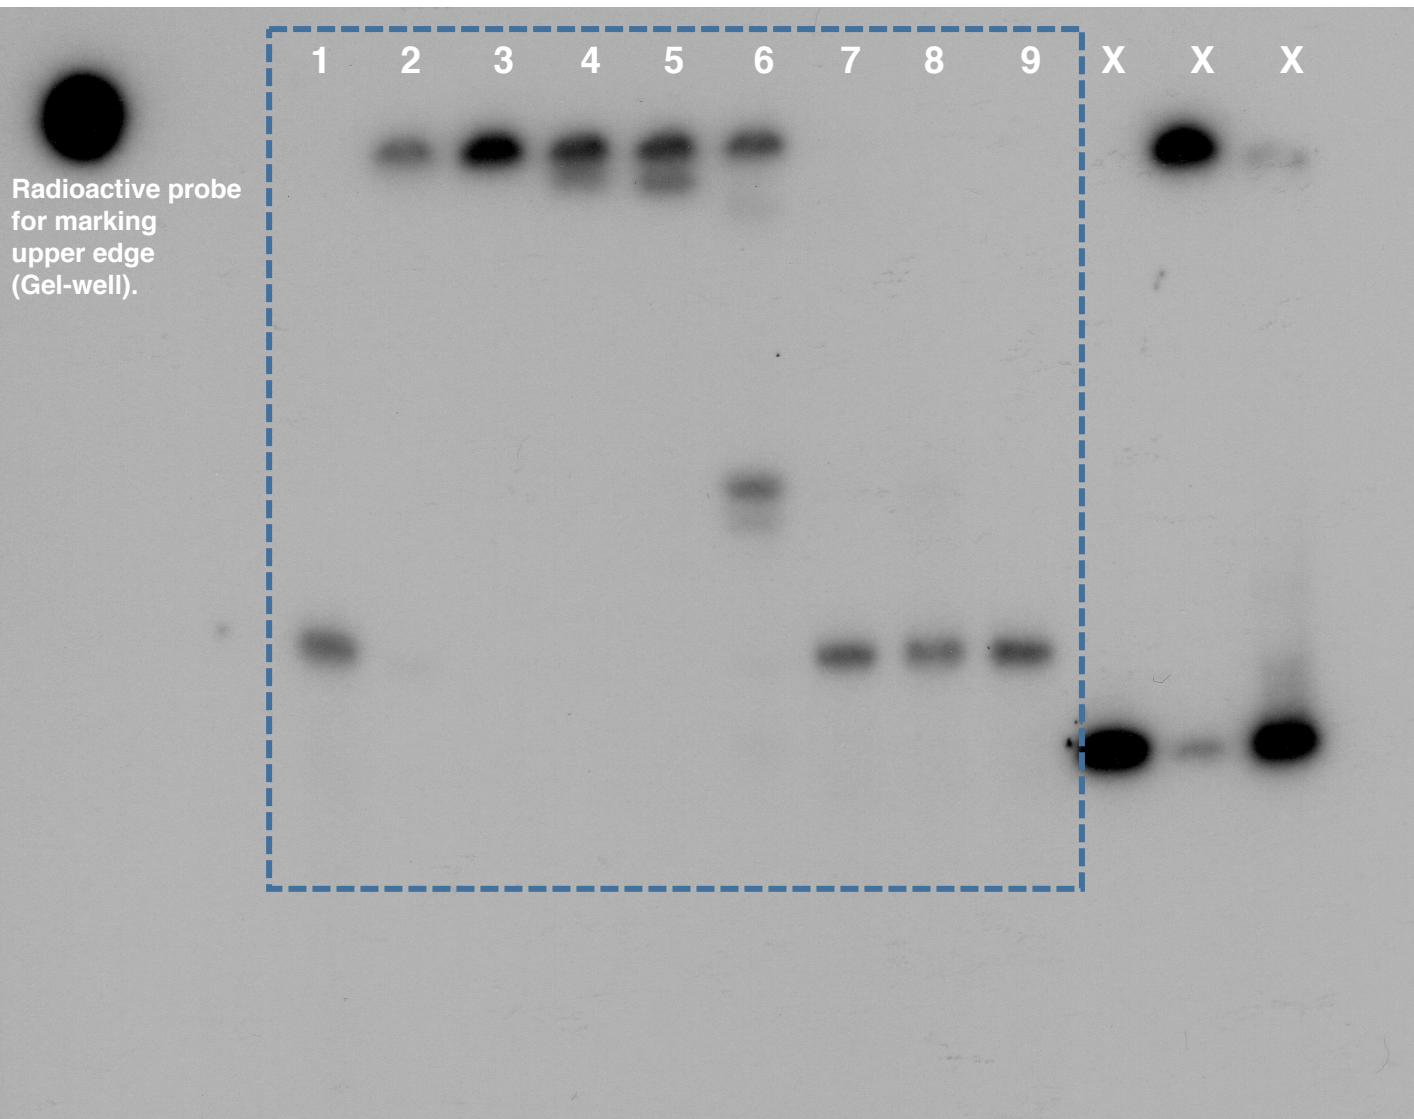

Fig. 4B

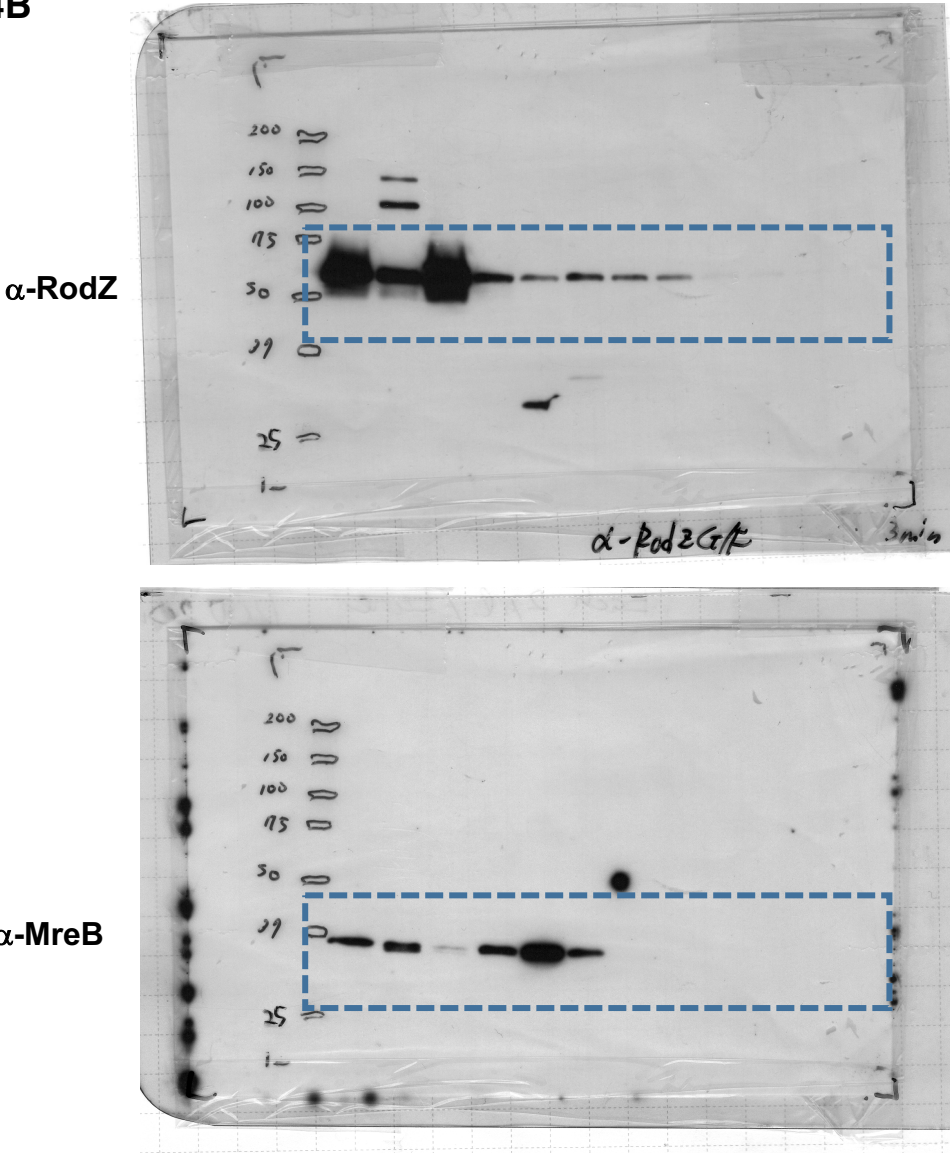



S1 Fig

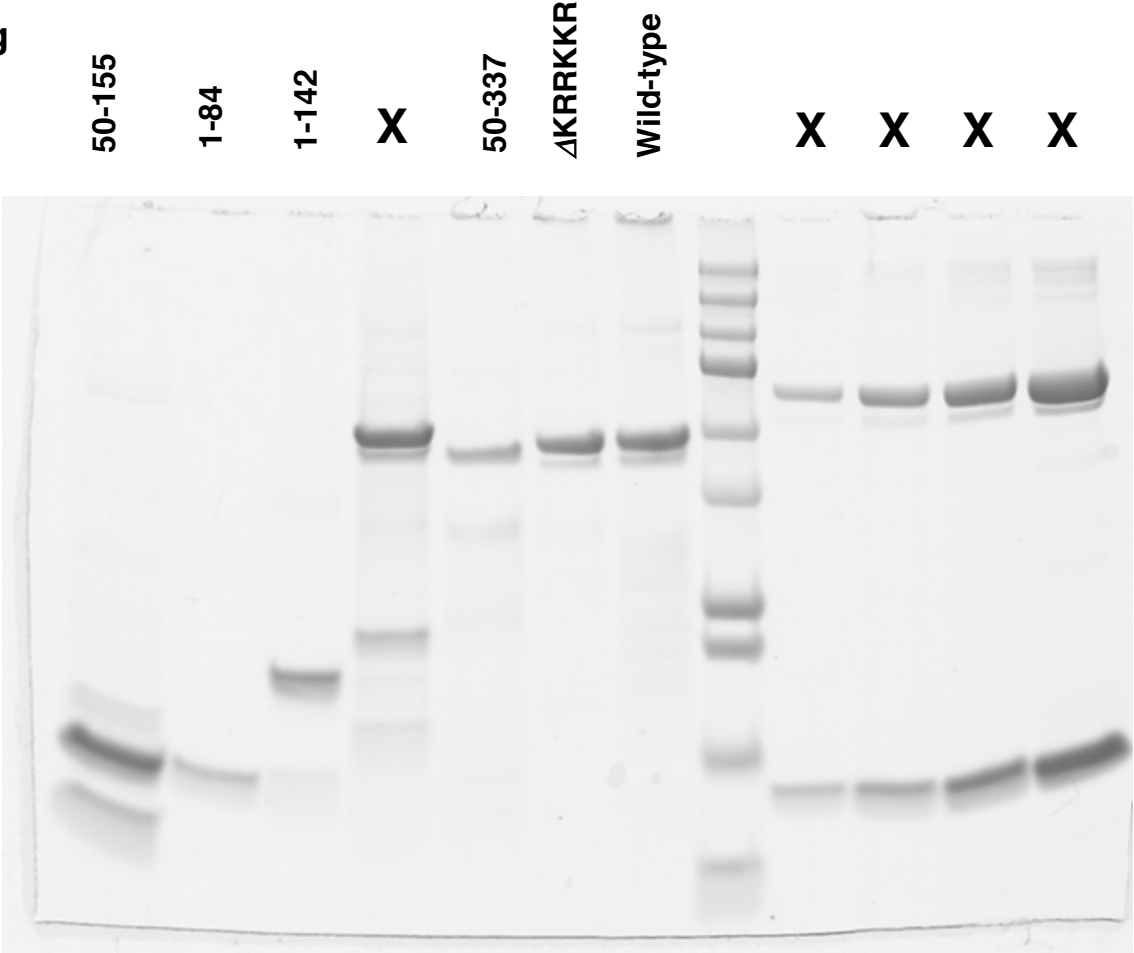

### S3 Fig

$\alpha$ -RodZ for 20 sec exposure

$\alpha$ -Hns for 1 min exposure

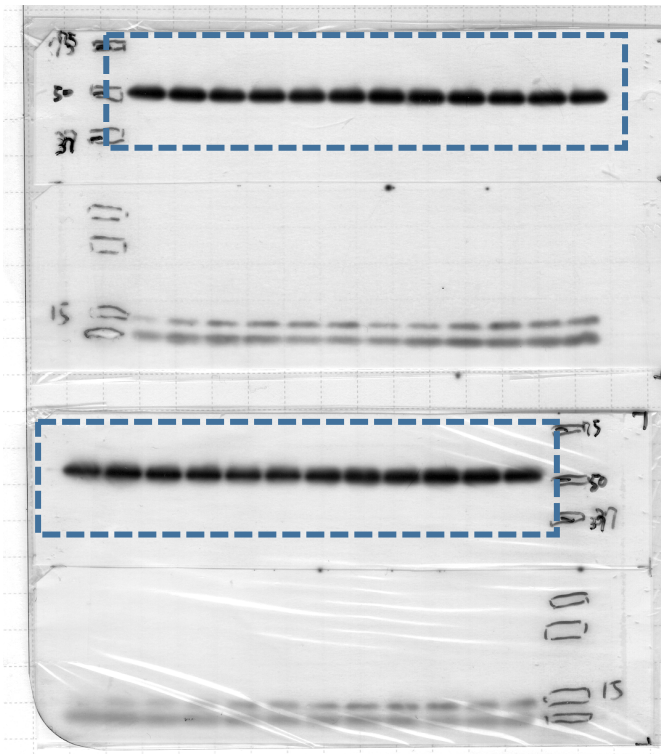

With PVDF membrane

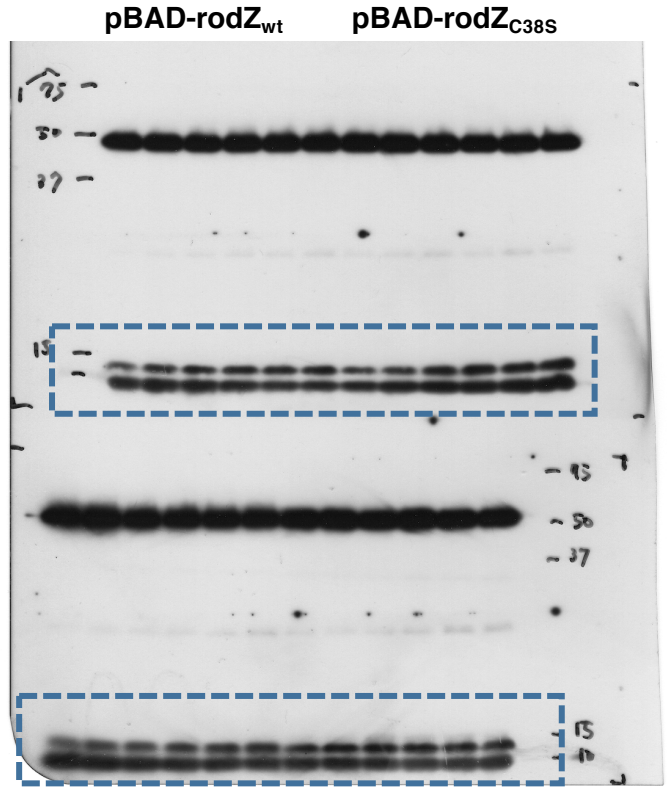

pBAD-rodZ<sub>C263S</sub>      pBAD-rodZ<sub>C38S, C263S</sub>

S4 Fig

1 2 X X X X 3 4 X X

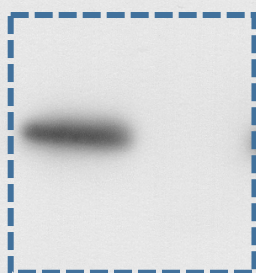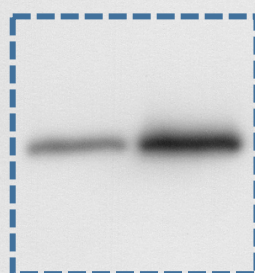

50

1 2 3 4 5 6 7 8 9 10
